# Supplementary material for: Consumer Cognition and Management Perspective on Express Packaging Pollution
Source: MDPI journal article supplement (doi:10.3390/ijerph19084895), 2022-04-18
Supplement: s1 [file s1]

# Supplementary Materials

## Consumer Cognition and Management Perspective on Express Packaging Pollution

Sisi Wu <sup>1</sup>, Xuan Gong <sup>1</sup>, Yunfei Wang <sup>1,\*</sup> and Jian Cao <sup>1,2</sup>

*1 School of Management, Zhejiang University of Technology, Hangzhou 310023, China; sswu\_zjut@163.com (S. W.); gongxuan\_up@163.com (X. G.); yfwang\_zjut@163.com (Y. W.); jcao@zjut.edu.cn (J. C.)*

*2 Center for Global & Regional Environmental Research, the University of Iowa, Iowa City 52242, United States*

*\* Correspondence: yfwang\_zjut@163.com*

## Part S1

### ● *Questionnaire design*

Likert five-level scale is used to evaluate the questions in our questionnaire. A pre-survey which includes 57 participants is used to avoid the ambiguity and increase the validity of the questionnaire. The initial questionnaire is revised and improved based on the opinions and suggestions provided by the participants. While the formal questionnaire covering all age groups in Zhejiang Province was released on April 19, 2019.

In order to facilitate the analysis, we divided the 20 questions into two parts, namely the basic information part and other parts. The former includes seven questions, corresponding to questions 14 to 20 of the questionnaire. While the latter is the main content of the questionnaire, corresponding to questions 1 to 13.

## Part S2

### Part S2.1

### ● *Factor analysis of recyclable express packaging*

As is shown in **Error! Reference source not found.**, three factors are extracted from Question 4, which explain the "75.6% of the total variance". In general, it is acceptable when the total variance is greater than 70% in social science surveys. So we extract three factors totally.

**Table S1.** Total variance explained of Q4.

| Component | Initial Eigenvalue |               |              | Extraction Sums of Squared |               |              | Rotation Sums of Squared |               |              |
|-----------|--------------------|---------------|--------------|----------------------------|---------------|--------------|--------------------------|---------------|--------------|
|           | Loadings           |               |              | Loadings                   |               |              | Loadings                 |               |              |
|           | Total              | % of Variance | Cumulative % | Total                      | % of Variance | Cumulative % | Total                    | % of Variance | Cumulative % |
| 1         | 4.522              | 56.524        | 56.524       | 4.522                      | 56.524        | 56.524       | 2.739                    | 34.241        | 34.241       |
| 2         | 0.880              | 10.995        | 67.519       | 0.880                      | 10.995        | 67.519       | 1.971                    | 24.643        | 58.884       |
| 3         | 0.643              | 8.040         | 75.559       | 0.643                      | 8.040         | 75.559       | 1.334                    | 16.675        | 75.559       |
| 4         | 0.526              | 6.576         | 82.135       |                            |               |              |                          |               |              |
| 5         | 0.438              | 5.472         | 87.608       |                            |               |              |                          |               |              |
| 6         | 0.390              | 4.874         | 92.482       |                            |               |              |                          |               |              |
| 7         | 0.340              | 4.248         | 96.729       |                            |               |              |                          |               |              |
| 8         | 0.262              | 3.271         | 100.000      |                            |               |              |                          |               |              |

Extraction Method: Principal Component Analysis.

The eight elements involved in Question 4 (appearance, price, reusability, firmness, convenience

of use, environmental pollution, convenience of recycling and return on recycling) are summarized as three factors of 'environmental protection and practicality', 'cost performance' and 'appearance'. As we can see from Table S1, Factor 1 (environmental protection and practicality) corresponds to elements 4.5 to 4.8. Factor 2 (cost performance) corresponds to elements 4.1, 4.3 and 4.4. Factor 3 (appearance) corresponds to element 4.2.

**Table S2.** Rotated structure matrix<sup>a</sup> of Q4.

|                                       | Component |       |       |
|---------------------------------------|-----------|-------|-------|
|                                       | 1         | 2     | 3     |
| 4.2 Appearance                        | 0.131     | 0.227 | 0.889 |
| 4.1 Price                             | 0.156     | 0.754 | 0.383 |
| 4.3 Reusability                       | 0.428     | 0.695 | 0.251 |
| 4.4 Firmness                          | 0.474     | 0.754 | 0.001 |
| 4.5 Convenience of use                | 0.785     | 0.304 | 0.112 |
| 4.6 Degree of environmental pollution | 0.790     | 0.296 | 0.047 |
| 4.7 Convenience of recycling          | 0.791     | 0.309 | 0.235 |
| 4.8 Return on recycling               | 0.652     | 0.153 | 0.513 |

Extraction Method: Principal Component Analysis.

Rotation Method: Varimax with Kaiser Normalization.

<sup>a</sup> Rotation converged in 6 iterations.

For the sake of studying the consumers' attention to these three factors, principal component analysis is used to analyze question 4, calculate the extracted three factors by score of principal component, and take the calculated results as the basis of the importance ranking of corresponding factors. The weight of each formula is the ratio of the eigenvalue of each element to the arithmetic square root of the eigenvalue of its principal component. The principal component model of these three factors is as follows:

$$y_1 = 0.062x_1 + 0.073x_2 + 0.201x_3 + 0.223x_4 + 0.369x_5 + 0.372x_6 + 0.372x_7 + 0.307x_8$$

$$y_2 = 0.242x_1 + 0.804x_2 + 0.741x_3 + 0.804x_4 + 0.324x_5 + 0.316x_6 + 0.329x_7 + 0.163x_8$$

$$y_3 = 1.109x_1 + 0.478x_2 + 0.313x_3 + 0.001x_4 + 0.140x_5 + 0.059x_6 + 0.293x_7 + 0.640x_8$$

The data from 561 questionnaires were put into the model for calculation. The value of y in Table S3 is the quantitative value of the importance of these three factors to consumers, which is obtained by averaging the corresponding values of all questionnaire data.

**Table S3.** The importance ranking of Q4.

| Factor | y | Ranking |
|--------|---|---------|
|--------|---|---------|

|                                           |      |   |
|-------------------------------------------|------|---|
| Cost performance                          | 13.8 | 1 |
| Appearance                                | 11.0 | 2 |
| Environmental protection and practicality | 7.71 | 3 |

## Part S2.2

### ● *Factor analysis of green express packaging*

Analysis of question 7 further, as shown in the Table S3, three factors can be extracted to explain the content of over 70% (76.9%) of the total variance. So we extract all three factors as well.

**Table S4.** Total variance explained of Q7.

| Component | Initial Eigenvalue |               |              | Extraction Sums of Squared Loadings |               |              | Rotation Sums of Squared Loadings |               |              |
|-----------|--------------------|---------------|--------------|-------------------------------------|---------------|--------------|-----------------------------------|---------------|--------------|
|           | Total              | % of Variance | Cumulative % | Total                               | % of Variance | Cumulative % | Total                             | % of Variance | Cumulative % |
| 1         | 4.716              | 58.950        | 58.950       | 4.716                               | 58.950        | 58.950       | 2.861                             | 35.757        | 35.757       |
| 2         | 0.853              | 10.657        | 69.607       | 0.853                               | 10.657        | 69.607       | 2.014                             | 25.174        | 60.931       |
| 3         | 0.584              | 7.295         | 76.902       | 0.584                               | 7.295         | 76.902       | 1.278                             | 15.971        | 76.902       |
| 4         | 0.467              | 5.831         | 82.733       |                                     |               |              |                                   |               |              |
| 5         | 0.439              | 5.489         | 88.222       |                                     |               |              |                                   |               |              |
| 6         | 0.365              | 4.568         | 92.790       |                                     |               |              |                                   |               |              |
| 7         | 0.303              | 3.784         | 96.574       |                                     |               |              |                                   |               |              |
| 8         | 0.274              | 3.426         | 100.000      |                                     |               |              |                                   |               |              |

Extraction Method: Principal Component Analysis.

The eight elements involved in Question 7 are the same as those in question 4, which can also be summarized into three factors, as shown in Table S5 and Table S6. Factor 1 corresponds to elements 7.5 to 7.8, called environmental protection and practicality. Factor 2 corresponds to elements 7.1, 7.3 and 7.4, called cost performance. Factor 3 corresponds to element 7.2, called appearance.

**Table S5.** Rotated structure matrix<sup>a</sup> of Q7.

|                | Component |       |       |
|----------------|-----------|-------|-------|
|                | 1         | 2     | 3     |
| 7.2 Appearance | 0.136     | 0.251 | 0.916 |
| 7.1 Price      | 0.205     | 0.851 | 0.244 |

|                                       |       |       |        |
|---------------------------------------|-------|-------|--------|
| 7.3 Reusability                       | 0.484 | 0.574 | 0.395  |
| 7.4 Firmness                          | 0.513 | 0.662 | 0.164  |
| 7.5 Convenience of use                | 0.705 | 0.441 | 0.130  |
| 7.6 Degree of environmental pollution | 0.724 | 0.428 | -0.027 |
| 7.7 Convenience of recycling          | 0.824 | 0.268 | 0.129  |
| 7.8 Return on recycling               | 0.777 | 0.096 | 0.402  |

Extraction Method: Principal Component Analysis.

Rotation Method: Varimax with Kaiser Normalization.

a Rotation converged in 6 iterations.

Similarly, after the same principal component analysis as question 4, the importance ranking of the three factors of Q7 can be obtained. The principal component model is shown below:

$$y_1 = 0.063x_1 + 0.094x_2 + 0.223x_3 + 0.236x_4 + 0.325x_5 + 0.333x_6 + 0.379x_7 + 0.358x_8$$

$$y_2 = 0.272x_1 + 0.921x_2 + 0.621x_3 + 0.717x_4 + 0.477x_5 + 0.463x_6 + 0.290x_7 + 0.104x_8$$

$$y_3 = 1.199x_1 + 0.319x_2 + 0.517x_3 + 0.215x_4 + 0.170x_5 - 0.035x_6 + 0.169x_7 + 0.526x_8$$

The value of y in Table 6 is the quantitative value of the importance of these three factors to consumers, which is obtained by averaging the corresponding values of all questionnaire data.

**Table S6.** The importance ranking of Q7.

| Factor                                    | y    | Ranking |
|-------------------------------------------|------|---------|
| Cost performance                          | 14.7 | 1       |
| Appearance                                | 11.8 | 2       |
| Environmental protection and practicality | 7.90 | 3       |

## Part S3

The structural equation model used in this paper is shown in Fig. S1. Eight observation variables are used to test consumers' evaluation of recyclable express packaging and green express packaging. These eight observation variables correspond to the eight questions in the questionnaire, namely, price, appearance, reusability, firmness, convention of using, environmental pollution, convention of recycling and return on recycling. Consumers' cognition of existing problems is tested from four aspects, corresponding to question 5 in the questionnaire. The observation variables of consumers' perception of the responsibility of the government, logistics enterprises and e-commerce enterprises correspond to the 11th question of the questionnaire. Finally, we take the four questions of question 9 as observation variables to study whether it can alleviate the environmental pressure caused by express packaging.

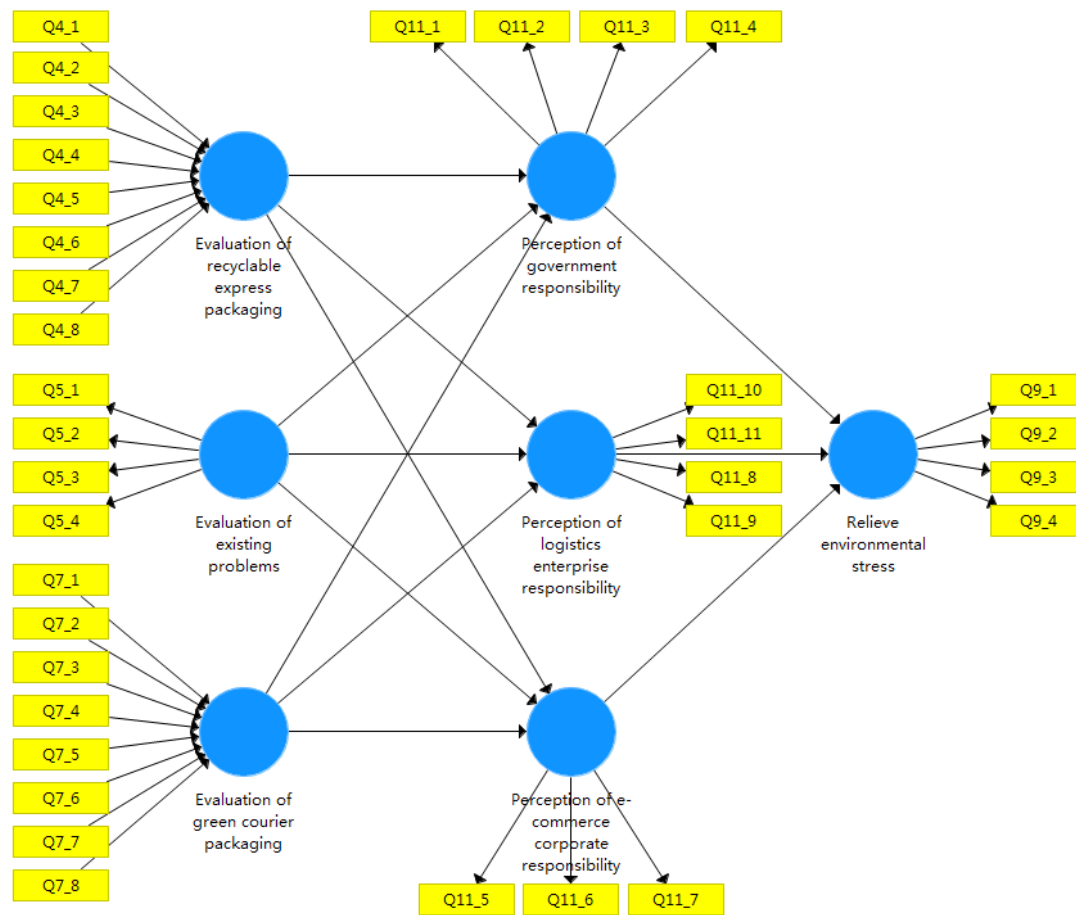

**Figure. S1** SEM details diagram.

## Appendix A

### Questionnaire on the environmental pollution of express packaging

Hello, dear madam / sir! I am a graduate student from the School of Management of Zhejiang University of Technology. I am doing a research on environmental pollution caused by express packaging. Can you please fill out the following questionnaire? Your identity and answers are absolutely confidential and will not be used for any commercial purposes. There is no right or wrong question option, please fill in according to your actual situation. Thank you for your support and help!

**1. Have you ever used the express delivery service before?**

☐ Yes

☐ No

**2. Do you know the environmental pollution caused by express packaging?**

|            |           |      |           |            |
|------------|-----------|------|-----------|------------|
| Completely | Basically | Know | Basically | Completely |
|------------|-----------|------|-----------|------------|

|                                                                                                                                                                   | don't know | don't know | a little | know | Know |
|-------------------------------------------------------------------------------------------------------------------------------------------------------------------|------------|------------|----------|------|------|
| 2.1 In the process of producing inferior plastic bags, tapes and cushions, heavy metals and inorganic gases that cause respiratory and blood diseases are emitted |            |            |          |      |      |
| 2.2 Inferior packaging materials are not degradable or difficult to degrade, and contaminated land and groundwater resources after landfill                       |            |            |          |      |      |
| 2.3 Inferior packaging materials are not degradable or difficult to degrade, contaminated land and groundwater resources after landfill                           |            |            |          |      |      |

3. Would you like to use **recyclable express packaging**? (Recyclable express packaging refers to plastic express boxes, shared express boxes, plastic cushions, etc. that can be recycled.)

- ☐ Yes, I would like to. ☐ No, I would not like to.

4. Do you care about the following characteristics of **recyclable express packaging**? (Recyclable express packaging refers to plastic express boxes, shared express boxes, plastic cushions, etc. that can be recycled.)

|                                                                       | Don't care at all | Don't care | Not sure | Care about | Care about extremely |
|-----------------------------------------------------------------------|-------------------|------------|----------|------------|----------------------|
| 4.1 Price                                                             |                   |            |          |            |                      |
| 4.2 Appearance                                                        |                   |            |          |            |                      |
| 4.3 Reusability                                                       |                   |            |          |            |                      |
| 4.4 Firmness                                                          |                   |            |          |            |                      |
| 4.5 Convenience of Using (For example: easy to remove)                |                   |            |          |            |                      |
| 4.6 Environmental Pollution                                           |                   |            |          |            |                      |
| 4.7 Convenience of Recycling                                          |                   |            |          |            |                      |
| 4.8 Return on Recycling (For example: recovering the return of money) |                   |            |          |            |                      |

5. What is your recognition of the following phenomena?

|                                                                | Completely disagree | Tend to disagree | Not sure | Tend to agree | Completely agree |
|----------------------------------------------------------------|---------------------|------------------|----------|---------------|------------------|
| 5.1 The low level of consumer willingness in recycling because |                     |                  |          |               |                  |

---

of the low return in recycling

5.2 The environmental awareness of consumers need to be improved

5.3 Lacking flexibility and diversity in recycling channel

5.4 Lacking leading companies in recycling

---

6. Would you like to use **green courier packaging**? (Green express packaging refers to degradable carton, degradable tape, etc.)

☐ Yes, I would like to.

☐ No, I would not like to.

7. Do you care about the following features of **green express packaging**? (Green express packaging refers to degradable carton, degradable tape, etc.)

|                                                                          | Don't<br>care at all | Don't<br>care | Not sure | Care<br>about | Care about<br>extremely |
|--------------------------------------------------------------------------|----------------------|---------------|----------|---------------|-------------------------|
| 7.1 Price                                                                |                      |               |          |               |                         |
| 7.2 Appearance                                                           |                      |               |          |               |                         |
| 7.3 Reusability                                                          |                      |               |          |               |                         |
| 7.4 Firmness                                                             |                      |               |          |               |                         |
| 7.5 Convenience of Using (For example:<br>easy to remove)                |                      |               |          |               |                         |
| 7.6 Environmental Pollution                                              |                      |               |          |               |                         |
| 7.7 Convenience of Recycling                                             |                      |               |          |               |                         |
| 7.8 Return on Recycling (For example:<br>recovering the return of money) |                      |               |          |               |                         |

---

8. The psychological **maximum price** you are willing to pay for green packaging is the \_\_\_\_ of the commodity price?

☐ <0.5%

☐ 0.5%-1%

☐ 1.01%-2%

☐ 2.01%-5%

☐ 5.01%-10%

☐ >10%

9. If recycling mechanism in china is increasingly perfect, and green express packaging are widely used, do you agree with the following behaviors as \_\_\_\_?

|                                                                                   | Completely<br>disagree | Tend to<br>disagree | Not sure | Tend to<br>agree | Completely<br>agree |
|-----------------------------------------------------------------------------------|------------------------|---------------------|----------|------------------|---------------------|
| 9.1 Willing to accept a simple package of express delivery                        |                        |                     |          |                  |                     |
| 9.2 Willing to use recyclable or green express delivery packaging<br>initiatively |                        |                     |          |                  |                     |
| 9.3 Willing to participate in the                                                 |                        |                     |          |                  |                     |

recycling activities of express  
packaging initiatives

9.4 Willing to recycle as much  
express packaging as possible

---

10. Who should take the responsibility for managing or reducing the environmental pollution caused by express packaging?

☐Government      ☐E-commerce company      ☐Logistics company      ☐Consumer

11. Do you think the following measures can alleviate the environmental pollution caused by express packaging?

|                                                                                                                                        | Completely<br>disagree | Tend to<br>disagree | Not sure | Tend to<br>agree | Completely<br>agree |
|----------------------------------------------------------------------------------------------------------------------------------------|------------------------|---------------------|----------|------------------|---------------------|
| 11.1 Introduce the tax policy by government promptly to reduce the pollution of express packaging                                      |                        |                     |          |                  |                     |
| 11.2 The government set up an environmental fund to help companies establish a scientific recycling system                             |                        |                     |          |                  |                     |
| 11.3 The government guides the establishment of scientific research institutions to promote research on environment-friendly materials |                        |                     |          |                  |                     |
| 11.4 The government strengthens the promotion of the recycling of express packaging                                                    |                        |                     |          |                  |                     |
| 11.5 Leading e-commerce companies promise to use recyclable or green express packaging                                                 |                        |                     |          |                  |                     |
| 11.6 E-commerce companies and logistics companies establish recycling cooperation                                                      |                        |                     |          |                  |                     |
| 11.7 E-commerce companies reward consumers for recycling                                                                               |                        |                     |          |                  |                     |
| 11.8 Logistics companies try to use non-adhesive cartons or paper tape to reduce the use of plastic tape                               |                        |                     |          |                  |                     |
| 11.9 Logistics companies open door-to-door recycling packaging services                                                                |                        |                     |          |                  |                     |
| 11.10 Logistics companies guide customers to use recyclable or green                                                                   |                        |                     |          |                  |                     |

courier packaging

11.11 Logistics companies establish  
information systems for recycling  
express packaging

---

12. Your online shopping frequency (an average of one month) is probably \_\_\_\_?

- ☐0-1 times per month      ☐2-5 times per month      ☐6-10 times per month  
☐10-15 times per month      ☐16 times or more per month

13. How many express packaging do you receive per month?

- ☐0-1      ☐2-5      ☐6-10      ☐11-15      ☐16 or more

14. **[Multiple choices]** Which three types of packaging do you think are a large amount of waste in daily life?

- ☐Waybill    ☐Envelope    ☐Carton    ☐Plastic bag    ☐Woven bag    ☐Plastic tape    ☐Cushion

15. What is your gender?

- ☐Male      ☐Female

16. How old are you?

- ☐12 and under      ☐Between 13 and 20      ☐Between 21 and 30  
☐Between 31 and 40      ☐Between 41 and 50      ☐Between 51 and 60  
☐61 and above

17. What is your occupation?

- ☐Student      ☐Retiree      ☐Manufacturing practitioner  
☐Transportation, warehousing and postal and telecommunications practitioners  
☐Financial industry, real estate industry, insurance industry and commercial service industry practitioners  
☐others \_\_\_\_\_

18. How much is your gross salary?

- ☐Less than USD 547      ☐Between USD 547 and 1,094  
☐Between USD 1,094 and 1,563      ☐Between USD 1,563 and 2,344  
☐More than USD 2,344

19. What is your highest education?

- ☐Elementary school and below      ☐Junior high school      ☐High school  
☐Undergraduate      ☐Postgraduate degree and above

20. Where is your current location?

- ☐Hangzhou    ☐Ningbo    ☐Huzhou    ☐Wenzhou    ☐Jiaxing    ☐Jinhua  
☐Lishui    ☐Quzhou    ☐Shaoxing    ☐Taizhou    ☐Zhoushan  
☐Others \_\_\_\_\_

The above is the entire content of this questionnaire, thank you for your cooperation!

Filename: ijerph-1616429-supplementary-1.docx  
Directory: E:\4.18\ijerph-1625593  
Template: C:\Users\MDPI\AppData\Roaming\Microsoft\Templates\Normal.d  
otm  
Title:  
Subject:  
Author: lhy  
Keywords:  
Comments:  
Creation Date: 4/14/2022 4:46:00 PM  
Change Number: 3  
Last Saved On: 4/18/2022 2:20:00 PM  
Last Saved By: MDPI  
Total Editing Time: 0 Minutes  
Last Printed On: 4/18/2022 2:20:00 PM  
As of Last Complete Printing  
Number of Pages: 11  
Number of Words: 2,307 (approx.)  
Number of Characters: 12,833 (approx.)
